# Supplementary material for: The relationships between knee extensors/ flexors strength and balance control in elite male soccer players
Source: PeerJ. 2021 Nov 16;9:e12461. doi: 10.7717/peerj.12461 (PMC8603814; doi:10.7717/peerj.12461)
Supplement: Supplemental Information 1 — All measurements that were used for the statistical analysis. [file peerj-09-12461-s001.xlsx]

## Sheet: Data
No.	BS/ND	BS/D	PT/D/Q/60kg	PT/ND/Q/60kg	PT/D/H/60kg	PT/ND/H/60kg	PT/D/Q/240kg	PT/ND/Q/240kg	TW/D/Q/240kg	TW/ND/Q/240kg	PT/D/H/240kg	PT/ND/H/240kg	TW/D/H/240kg	TW/ND/H/240kg	H/Q/D/60	H/Q/ND/60	H/Q/D/240	H/Q/ND/240
1	8.2	8.9	2.7	3.3506	1.90602	2.05422	1.73976	1.99398	43.6831	52.1133	1.32169	1.32169	40.1205	38.4494	0.705935	0.613089	0.759695	0.66284
2	11.2	9.4	3.2481	2.71013	1.24177	1.69873	1.84557	1.83797	47.8456	41.1557	1.24177	1.08734	32.5456	29.2063	0.382307	0.62681	0.67284	0.591598
3	14.4	14.1	3.2747	2.9	1.74458	1.68434	1.80482	1.78916	48.3614	45.8277	1.26747	1.35663	31.4627	32.0988	0.532745	0.580806	0.70227	0.758249
4	13.5	11.9	3.34416	2.87792	2.15844	2.16623	2.1961	1.9974	52.8766	50.8597	1.41688	1.5039	35.5273	36.6247	0.645437	0.752708	0.64518	0.752926
5	10.5	13.6	3.55135	3.39324	2.12568	1.59189	2.51486	2.04595	53.3662	46.1784	1.43108	1.39054	38.9365	36.9527	0.598554	0.469136	0.569049	0.679657
6	13.9	14.7	3.06667	3.232	1.65467	1.672	1.82533	2.116	57.576	60.5187	1.10133	1.04667	29.704	24.9013	0.539565	0.517327	0.60336	0.494644
7	10.3	12.4	3.47463	3.45672	2.04478	1.74627	2.40746	2.22537	64.3388	58.9567	1.33582	1.21493	38.3194	38.091	0.588488	0.505181	0.554867	0.545942
8	8.5	12.9	2.52192	2.51233	1.46712	1.38356	1.77808	1.76164	55.7178	56.7795	1.19863	1.2	28.6151	27.4493	0.581749	0.550709	0.674114	0.681182
9	10.3	9.7	3.1131	3.26667	1.47857	1.38214	2.15	2.19286	54.975	58.0845	0.990476	0.855952	19.3083	18.7524	0.474952	0.423105	0.460687	0.390337
10	11.2	11.1	3.048	2.46133	2.23333	1.95333	2.00933	1.79067	57.1733	58.3493	1.46133	1.532	41.6173	47.7987	0.732721	0.793608	0.727273	0.855547
11	10.2	11.2	2.59595	2.25405	1.93919	1.6973	2.01486	1.95946	64.7932	66.5486	1.55135	1.31757	49.5716	46.2811	0.747007	0.752998	0.769953	0.672414
12	14.8	14	2.8038	2.88987	1.66835	1.62405	1.74304	2.00506	41.5051	49.7329	1.05443	1.16456	27.5747	23.8443	0.595034	0.56198	0.604938	0.580808
13	11.3	10.4	3.31429	3.10357	1.79286	1.50476	2.06548	1.75238	57.7738	50.8095	1.46786	1.22024	41.2726	43.5107	0.540948	0.484848	0.710663	0.696332
14	9.8	11	3.15978	2.9	1.72065	1.36196	2.34457	1.92174	52.1989	50.1707	1.42283	1.25326	34.8348	33.4054	0.544548	0.46964	0.606861	0.652149
15	9.8	10.1	3.61625	3.33	2.255	1.83375	2.0975	2.13	47.1925	53.7325	1.65125	1.66	26.3575	32.7863	0.623574	0.550676	0.787247	0.779343
16	6.5	5.6	3.39877	3.3358	2.27284	1.8	2.5679	2.5321	59.5012	54.7012	1.62099	1.50617	35.6481	33.116	0.668725	0.5396	0.63125	0.594832
17	5.3	5.6	3.32533	3.276	1.94267	1.97067	2.03733	2.128	46.8533	45.5187	1.20933	1.348	28.7973	27.444	0.584202	0.601547	0.593586	0.633459
18	6.2	6.4	3.775	3.89125	1.9675	1.8125	2.30375	2.23625	56.3987	53.18	1.53	1.29125	33.185	29.4862	0.521192	0.465789	0.664135	0.577418
19	10.6	11.6	3.39324	3.14595	2.28378	2.16351	2.10676	2.08378	54.3108	52.923	1.50946	1.28108	38.9865	34.0297	0.673039	0.687715	0.716485	0.614786
20	13.3	11.5	3.38493	3.22055	1.87123	1.86575	2.04658	1.8411	54.4808	52.1055	1.4726	1.56438	44.0726	44.411	0.552813	0.579328	0.719545	0.849702
21	13	12.2	2.81493	3.45224	1.74925	1.6194	2.14328	2.2	51.6761	51.3701	1.39254	1.45821	38.4881	43.006	0.621421	0.469088	0.649721	0.662822
22	9.4	9.8	3.77683	3.93537	2.03415	2.00122	2.58293	2.54634	59.8634	56.6476	1.55	1.53537	32.9756	32.9549	0.538586	0.508522	0.600094	0.602969
23	8.6	6.2	3.26753	3.64416	1.79221	1.58442	2.17922	2.4013	52.8364	58.261	1.44416	1.34026	36.7195	36.0844	0.54849	0.434783	0.662694	0.55814
24	12	12.8	3.30133	3.04	1.99467	1.74	2.00133	2.12667	45.4373	47.236	1.52667	1.304	24.4947	24.9587	0.6042	0.572368	0.762825	0.613166
25	9.9	13.7	3.55467	3.77467	2.348	2.15467	2.528	2.59067	57.3413	55.788	1.56267	1.43067	34.056	32.596	0.66054	0.570823	0.618143	0.552239
26	11.4	10.2	2.5358	2.6679	1.88642	1.74198	1.64938	1.82469	37.2198	39.6037	1.10494	1.14074	28.1469	25.8235	0.743914	0.652938	0.66991	0.625169
27	7.6	7.5	3.47922	3.78831	2.17792	1.80649	2.17403	2.45844	51.0844	57.113	1.64416	1.58831	40.4805	35.8143	0.62598	0.47686	0.756272	0.646064
28	16.8	14.7	2.58434	2.66024	1.37108	1.44578	1.77952	1.73976	54.2205	46.6843	0.895181	1.00241	25.2373	28.5229	0.530536	0.543478	0.503047	0.576177
29	14.3	13.8	3.01585	2.60488	1.60976	1.25244	1.81951	1.58659	47.572	37.989	1.22805	1.07195	32.8439	30.939	0.533765	0.480805	0.674933	0.675634
30	15	15.3	3.48721	3.47558	2.2186	1.97442	1.91744	1.99419	42.493	49.3488	1.51628	1.32791	35.0907	37.9419	0.636212	0.568083	0.790782	0.665889
31	8.4	7.7	3.14605	2.97105	1.80789	1.73816	2.22105	2.14211	60.9303	60.8566	1.525	1.36184	36.4592	38.2658	0.574655	0.585031	0.686611	0.635749
32	13.3	10.8	3.37867	2.672	1.93333	1.48133	1.94933	1.83333	49.412	50.0093	1.292	1.08667	20.3507	19.3733	0.572218	0.554391	0.662791	0.592727
33	12.2	10.8	2.97527	2.02796	1.79785	1.60215	1.82473	1.56129	41.7505	45.0667	1.3828	1.24194	28.0677	27.129	0.604265	0.790032	0.757808	0.795455
34	12.9	12.9	3.53651	3.80476	2.2381	2.22063	2.26825	2.44603	68.1349	65.0032	1.52381	1.48254	42.0603	33.5984	0.632855	0.583646	0.671798	0.6061
35	12.9	10.4	3.24337	3.12289	1.67229	1.7241	1.98193	1.79277	65.6711	54.641	1.20602	1.12169	32.0928	26.6506	0.515602	0.552083	0.608511	0.625672
36	10	10.4	3.49	3.29429	2.18429	2.13714	1.82714	1.87429	54.0743	52.9757	1.34429	1.39	36.9586	37.0743	0.62587	0.648742	0.735731	0.741616
37	10.8	11.2	3.36438	2.61644	2.24932	1.9589	2.17123	1.93973	49.7507	45.0288	1.64384	1.5	33.9082	35.4589	0.668567	0.748691	0.757098	0.773305
38	9.8	9.9	3.21707	3.04634	1.93902	1.75	2.03049	2.00854	45.0512	40.3878	1.28049	1.26707	31.1902	27.1671	0.602729	0.57446	0.630631	0.630844
39	8.4	8.4	3.24937	2.89747	1.87089	1.76582	2.45443	2.40886	58.7418	56.2873	1.51899	1.51392	43.2304	38.281	0.575769	0.609436	0.618876	0.628481
40	15	17.3	3.132	2.988	1.78533	1.44533	1.85067	1.73467	41.4973	41.5547	1.18533	1.05067	28.0213	26.3973	0.57003	0.483713	0.64049	0.605688
41	10.4	12.1	3.48	3.372	2.16533	1.856	2.312	2.29333	48.9307	52.1973	1.65067	1.49467	29.744	28.616	0.622222	0.550415	0.713956	0.651744
42	9.1	9.7	3.56623	3.38571	1.78961	1.71429	2.21818	2.44286	48.713	49.8416	1.36364	1.28182	30.5766	30.5519	0.501821	0.506329	0.614754	0.524721
43	8.3	7.4	3.14559	3.65882	2.77353	2.69265	2.375	2.36176	53.8529	49.6971	1.86471	1.73088	37.3985	34.2162	0.88172	0.735932	0.785139	0.732877
44	11	11.4	3.55513	3.02692	1.85128	1.66795	2.52692	2.38077	52.7692	45.0321	1.57564	1.32821	32.5462	27.3949	0.520736	0.551038	0.623541	0.557889
45	8.1	8.6	2.83816	2.83816	1.69605	1.74474	1.87105	2.05921	45.275	51.3829	1.32763	1.26974	32.7461	31.0816	0.597589	0.614743	0.709564	0.616613
46	8.5	7.8	3.65584	3.68052	2.5013	2.37273	2.24156	2.22857	52.0883	53.5052	1.81688	1.89481	44.0948	47.1169	0.684192	0.644672	0.810545	0.850233
47	14.6	13.9	2.74211	2.47763	1.83947	1.31053	1.575	1.59868	33.5474	38.3882	1.11974	1.14342	29.2053	30.9329	0.670825	0.528943	0.710944	0.715226
48	9	9.9	2.72143	2.92	1.32429	1.56143	2.07571	1.90429	67.7471	59.4129	1.09714	1.17429	37.2943	37.6	0.486614	0.534736	0.528562	0.616654
49	12.2	11.7	3.07901	2.75309	2.1321	1.90123	1.83333	1.58272	62.5	56.6741	1.38272	1.24444	41.6444	42.6877	0.692462	0.690583	0.754209	0.786271
50	15.2	14	3.38333	3.10769	1.76667	1.92564	2.01282	1.90256	45.7218	43.4385	1.32949	1.26282	27.5628	24.2	0.522167	0.619637	0.66051	0.663747
51	11.9	13.9	2.55488	2.70366	1.58902	1.56585	1.80732	1.80244	50.8598	53.0902	1.1561	1.17683	27.4183	30.578	0.621957	0.579161	0.639676	0.652909
52	8.6	7.2	3.18152	2.03696	1.91087	1.51739	1.65652	1.13152	40.2402	26.7848	1.10109	0.994565	24.1446	21.0163	0.600615	0.744931	0.664698	0.878963
53	10.7	10.8	3.14884	3.44651	2.33721	2.44419	2.15	2.19419	66.9465	65.0814	1.62558	1.45581	46.8198	40.0512	0.742245	0.709177	0.756084	0.663487
54	13.3	12.5	2.83919	2.8	1.58378	1.58243	1.65811	1.47838	44.8608	46.7284	1.17027	1.09189	24.1459	29.2324	0.55783	0.565154	0.705786	0.738574
55	13.9	12.9	2.83425	2.82466	2.13288	1.66164	2.10274	1.91507	53.4288	51.2521	1.33425	1.20411	26.5411	30.0151	0.752537	0.588264	0.634528	0.628755
56	12.1	11.4	3.17561	3.13659	2.28537	1.87317	2.1	1.95488	63.7159	57.5305	1.59634	1.34268	36.7561	38.8	0.719662	0.597201	0.760163	0.686837
57	11.8	13	3.40506	3.51772	2.18861	2.13671	1.93418	2.0519	47.1633	49.3684	1.37342	1.20127	34.4241	27.9506	0.642751	0.607413	0.710079	0.585441
58	10.4	11.5	3.52235	3.07412	1.65765	1.62471	2.28	2.03647	54.0447	47.5153	1.26706	1.16588	27.5788	24.3388	0.470608	0.528511	0.555728	0.572501
59	12.4	13.7	3.444	3.60267	1.73733	1.81333	1.79467	1.85867	49.2107	49.236	0.8	0.961333	19.752	23.504	0.504452	0.503331	0.445765	0.517217
60	10.1	8.6	2.20465	2.02442	1.12442	1.38837	1.83953	1.5	56.2791	52.2198	1.18023	1.3686	29.157	35.3035	0.510021	0.685813	0.641593	0.912403
61	13.2	13.9	2.76061	2.70505	1.34949	1.09394	2.1596	1.99091	61.8495	58.1192	1.16263	0.951515	18.5323	17.8747	0.48884	0.404406	0.538354	0.47793
62	11.2	13.4	3.67349	3.56506	2.01928	1.93012	2.14458	1.98675	58.6301	50.4614	1.38795	1.08434	27.0627	28.2614	0.549688	0.541399	0.647191	0.545785
63	13.7	13.6	2.83614	3.09639	2.38193	1.96747	1.87108	1.88434	52.3819	57.0482	1.38193	1.24578	34.6614	36.7133	0.839847	0.635409	0.738571	0.661125
64	15.7	16.5	3.29467	3.136	1.676	1.65867	1.73067	1.52	44.0307	45.9613	1.09333	1.03733	20.7307	23.368	0.508701	0.528912	0.631741	0.682456
65	11.4	11.8	3.00976	2.96951	1.83902	1.72195	1.92927	2.00366	44.8244	44.678	1.43293	1.32317	32.411	28.9293	0.611021	0.579877	0.742731	0.660377
66	14.4	13.1	3.25	3.10385	1.63077	1.79872	2.25385	1.88718	48.4654	42.1795	1.31923	1.3	26.0346	26.0872	0.501775	0.579513	0.585324	0.688859
67	15	13.2	2.78506	2.61034	1.8046	1.6931	2.16782	2.08621	54.9333	58.6069	1.27011	1.0908	20.5345	25.3655	0.647957	0.648613	0.585896	0.522865
68	12	16	3.76087	3.5058	1.67536	1.53043	2.35362	2.28261	49.3043	48.9464	1.11594	0.92029	23.3246	22.3638	0.445472	0.436544	0.474138	0.403175
69	13.3	15.9	3.75846	3.31538	2.10615	1.77692	2.30154	2.44308	53.2708	53.0692	1.44	1.34923	33.1754	29.6385	0.560377	0.535963	0.625668	0.552267
70	9.8	11	3.45063	3.33544	2.08987	1.85063	2.29367	2.18101	57.3443	52.7215	1.58987	1.41519	40.9418	36.2633	0.605649	0.554839	0.693157	0.648868
71	11.5	9.4	2.29759	2.60723	1.86024	1.64578	1.66506	1.90843	41.2157	48.1169	1.46747	1.31325	38.9241	32.5699	0.809649	0.631238	0.881331	0.688131
72	15.4	14.6	3.13789	2.88526	1.54842	1.36947	2.21158	2.18632	45.7642	44.9453	1.28421	1.35368	24.2979	19.8684	0.493459	0.474644	0.580676	0.619162
73	7.8	6.9	3.79833	3.28	2.33167	1.95833	2.425	1.92167	53.56	47.6567	1.62167	1.38167	37.28	27.285	0.613866	0.597053	0.668729	0.718994
74	10.9	11.4	3.28049	3.18171	1.94146	1.73171	2.13537	1.83659	46.3988	41.922	1.44634	1.27561	30.8	28.8061	0.591822	0.54427	0.677327	0.694555
75	11.5	11.8	3.50649	3.16494	1.81558	1.92078	2.30519	1.99221	59.8935	54.9286	1.24026	1.21169	29.3312	29.5545	0.517778	0.606894	0.538028	0.608214
76	8.2	6.2	2.83699	2.55342	1.50959	1.61096	1.8863	1.93973	44.9219	39.2836	1.10822	1.30959	28.1288	26.4014	0.53211	0.630901	0.587509	0.675141
77	11.5	10.2	2.71739	2.73804	1.86739	1.6913	1.70435	1.57826	47.6359	48.0435	1.20543	1.2163	23.5946	24.7424	0.6872	0.617705	0.70727	0.770661
